# Supplementary material for: Screening for substandard and falsified medicines in Nigeria using visual inspection and GPHF-Minilab analysis: lessons learnt for future training of health workers and pharmacy personnel
Source: PubMed Central journal article supplement (PMC11632929; doi:10.1080/20523211.2024.2432471), 2024-12-09
Supplement: JPPP_A_2432471_SM8524.pdf [file JPPP_A_2432471_SM8524.pdf]

**Supplementary Table S2. Summary of the results of compendial assay analysis**

| No. | Active pharmaceutical ingredient (API) | Dosage form          | Total number of samples | Falsified, not containing the declared API | API detected, but <50% of declared amount | API content from 50% to <80% of declared amount | API content ≥80% but lower than USP threshold | API content higher than USP threshold | API content within USP specifications |
|-----|----------------------------------------|----------------------|-------------------------|--------------------------------------------|-------------------------------------------|-------------------------------------------------|-----------------------------------------------|---------------------------------------|---------------------------------------|
| 1   | Atenolol                               | tablet               | 14                      | 0                                          | 0                                         | 1                                               | 0                                             | 0                                     | 13                                    |
| 2   | Ceftriaxone                            | powder for injection | 23                      | 0                                          | 0                                         | 0                                               | 0                                             | 0                                     | 23                                    |
| 3   | Cefuroxime axetil                      | tablet               | 24                      | 0                                          | 0                                         | 0                                               | 2                                             | 0                                     | 22                                    |
| 4   | Chloroquine                            | tablet               | 16                      | 1                                          | 1                                         | 0                                               | 1                                             | 1                                     | 12                                    |
| 5   | Ciprofloxacin                          | tablet               | 26                      | 0                                          | 0                                         | 0                                               | 5                                             | 0                                     | 21                                    |
| 6   | Dexamethasone                          | tablet               | 22                      | 0                                          | 1                                         | 7                                               | 12                                            | 0                                     | 2                                     |
| 7   | Fluconazole                            | capsule or tablet    | 22                      | 0                                          | 0                                         | 1                                               | 0                                             | 0                                     | 21                                    |
| 8   | Furosemide                             | tablet               | 14                      | 0                                          | 0                                         | 0                                               | 0                                             | 0                                     | 14                                    |
| 9   | Glibenclamide                          | tablet               | 19                      | 0                                          | 0                                         | 1                                               | 3                                             | 0                                     | 15                                    |
| 10  | Hydrochlorothiazide                    | tablet               | 16                      | 0                                          | 0                                         | 0                                               | 1                                             | 0                                     | 15                                    |
| 11  | Metformin hydrochloride                | tablet               | 22                      | 0                                          | 0                                         | 0                                               | 1                                             | 0                                     | 21                                    |
| 12  | Metronidazole                          | tablet               | 25                      | 0                                          | 1                                         | 0                                               | 1                                             | 0                                     | 23                                    |
| 13  | Cotrimoxazole                          | tablet               | 17                      | 3                                          | 2                                         | 2                                               | 0                                             | 0                                     | 10                                    |
|     | <b>Total</b>                           |                      | <b>260</b>              | <b>4</b>                                   | <b>5</b>                                  | <b>12</b>                                       | <b>26</b>                                     | <b>1</b>                              | <b>212</b>                            |

Detailed compendial analysis results of all samples are published in Gabel et al. (2024) Am J Trop Med Hyg 111: 179-195.
